# Supplementary material for: Optimizing oxygen functional groups on porous carbon monoliths by green activation promotes seawater hydrogen evolution
Source: Royal Society of Chemistry journal article supplement (doi:10.1039/d5gc00029g), 2025-01-01
Supplement: d5gc00029g1.pdf [file d5gc00029g1.pdf]

## **Optimizing Oxygen Functional Groups on Porous Carbon Monoliths by Green Activation Promotes Seawater Hydrogen Evolution**

Bei Li<sup>a</sup>, Shiyang Fei<sup>b\*</sup>, Zhenlu Liu<sup>a</sup>, Changshui Wang<sup>a</sup>, Zhiqiang Sun<sup>a</sup>, Chunmei Zhang<sup>c\*</sup>, Haoqi Yang<sup>d</sup>, Hongliang Zhao<sup>e</sup>, Qian Zhang<sup>a, f\*</sup>, Shuijian He<sup>a\*</sup>

<sup>a</sup> Co-Innovation Center of Efficient Processing and Utilization of Forest Resources, International Innovation Center for Forest Chemicals and Materials, Nanjing Forestry University, Nanjing 210037, China

<sup>b</sup> Guangdong YounYan Energy Technology Co., Ltd, Guangzhou 510515, China

<sup>c</sup> Institute of Materials Science and Devices, School of Materials Science and Engineering, Suzhou University of Science and Technology, Suzhou 2150009, China

<sup>d</sup> Institute of Technology for Carbon Neutralization, College of Electrical, Energy and Power Engineering, Yangzhou University, Yangzhou, Jiangsu 225127, China

<sup>e</sup> Key Laboratory of Quality Safe Evaluation and Research of Degradable Material, State Administration for Market Regulation; Hainan Academy of Inspection and Testing, Haikou, Hainan 570203, China

<sup>f</sup> Fujian Key Laboratory of Eco-Industrial Green Technology, College of Ecology and Resources Engineering, Wuyi University, Wuyishan 354300, China

E-mail: camazfei@163.com (Shiyang Fei), cmzhang@usts.edu.cn (Chunmei Zhang), zhangqian5689@njfu.edu.cn (Qian Zhang), shuijianhe@njfu.edu.cn (Shuijian He)

## Experimental Section

**Materials and Chemicals:** Potassium hydroxide (KOH), sodium chloride (NaCl), and hydrogen peroxide (H<sub>2</sub>O<sub>2</sub>, 30%) were purchased from Sinopharm Co. Ltd and used without further purification. Natural seawater was obtained from Qingdao, China. Natural poplar wood was sourced by Chenlin Industrial Co. Ltd.

**Fabrication of CW:** Natural poplar wood was cut into small cross-section chips with dimensions of 2 × 2 × 0.2 cm<sup>3</sup> (length × width × height). The wood chips were then subjected to thermal treatment in a tube furnace. Initially, the chips were heated at 260 °C for 2 hours, followed by further and then heated at 1000 °C for 2 hours under an N<sub>2</sub> atmosphere to produce carbonized wood (CW). The CW was subsequently modified by reacting it with H<sub>2</sub>O<sub>2</sub> in a reaction vessel containing 60 mL of 1 wt% H<sub>2</sub>O<sub>2</sub> solution. The reaction vessel was heated in an oven for 1, 3, and 5 hours.

**Characterization:** Electrochemical measurements were performed using a CHI 760E electrochemical workstation. The surface morphologies of the samples were characterized with a Hitachi SU8010 field emission scanning electron microscope (FESEM). Phase and chemical composition analyses were performed using X-ray diffraction (XRD, Ultima IV) and X-ray photoelectron spectroscopy (XPS, ESCALAB 250XI). Raman spectra were recorded with a DXR532 Raman spectrometer with a 532 nm laser. Nitrogen adsorption-desorption isotherms were measured using a Quantachrome Autosorb IQ to determine the Brunauer-Emmett-Teller (BET) specific surface area. Water contact angles were measured with a JC2000 device.

**Electrochemical Measurements:** All measured potentials were referenced to a reversible hydrogen electrode (RHE) using the Nernst equation ( $E_{\text{RHE}} = E_{\text{Hg}/\text{HgO}} + 0.059 \times \text{pH} + 0.098 \text{ V}$ ). The linear sweep voltammetry (LSV) measurements were carried out at a scan rate of 1 mV s<sup>-1</sup> with an automatic 95% compensation on an electrochemical workstation. Nyquist plots were obtained over a frequency range of 0.1 Hz to 100 kHz

with an amplitude of 5 mV. Catalyst durability was assessed using the chronoamperometry method.

### DFT calculations

The spin-polarized density functional theory (DFT) calculations were performed using the Vienna Ab-initio Simulation Package (VASP) [1-2], which incorporates Projected Augmented Wave (PAW) pseudopotentials [3]. The exchange-correlation energy was treated using the generalized gradient approximation (GGA) method with the Perdew-Burke-Ernzerhof (PBE) functional [4-5]. A plane-wave energy cutoff of 450 eV was employed. The Monkhorst-Pack scheme with a k-point mesh of  $3 \times 3 \times 1$  and a k-point spacing of  $0.05 \text{ \AA}^{-1}$  was used to sample the first Brillouin zone [6]. All atoms were fully relaxed during the optimizations. A vacuum space of 15 Å was applied above the molecular system to prevent periodic interactions throughout the calculations. Geometry relaxation was carried out using the Quasi-Newton I-BFGS method until the maximum energy and force on each degree of freedom were less than  $1.0 \times 10^{-5}$  eV and  $0.01 \text{ eV/\AA}$ , respectively.

To obtain the free energy profile, Gibbs free energies for all states were calculated based on the ZPE-corrected DFT total energy, set as the enthalpy at 0 K. The free energy was calculated using the following expression:

$$G = H - TS = E_{DFT} + E_{ZPE} + \int_0^{298.15K} C_V dT - TS$$

where  $E_{DFT}$  is the total energy from DFT optimization,  $E_{ZPE}$  is the zero-point vibrational energy,  $C_V$  is the heat capacity, T is the temperature in Kelvin, and S is the entropy. The free energy for the gas-phase molecule was calculated using standard thermodynamic data at the standard state (refer to [www.nist.com](http://www.nist.com)).

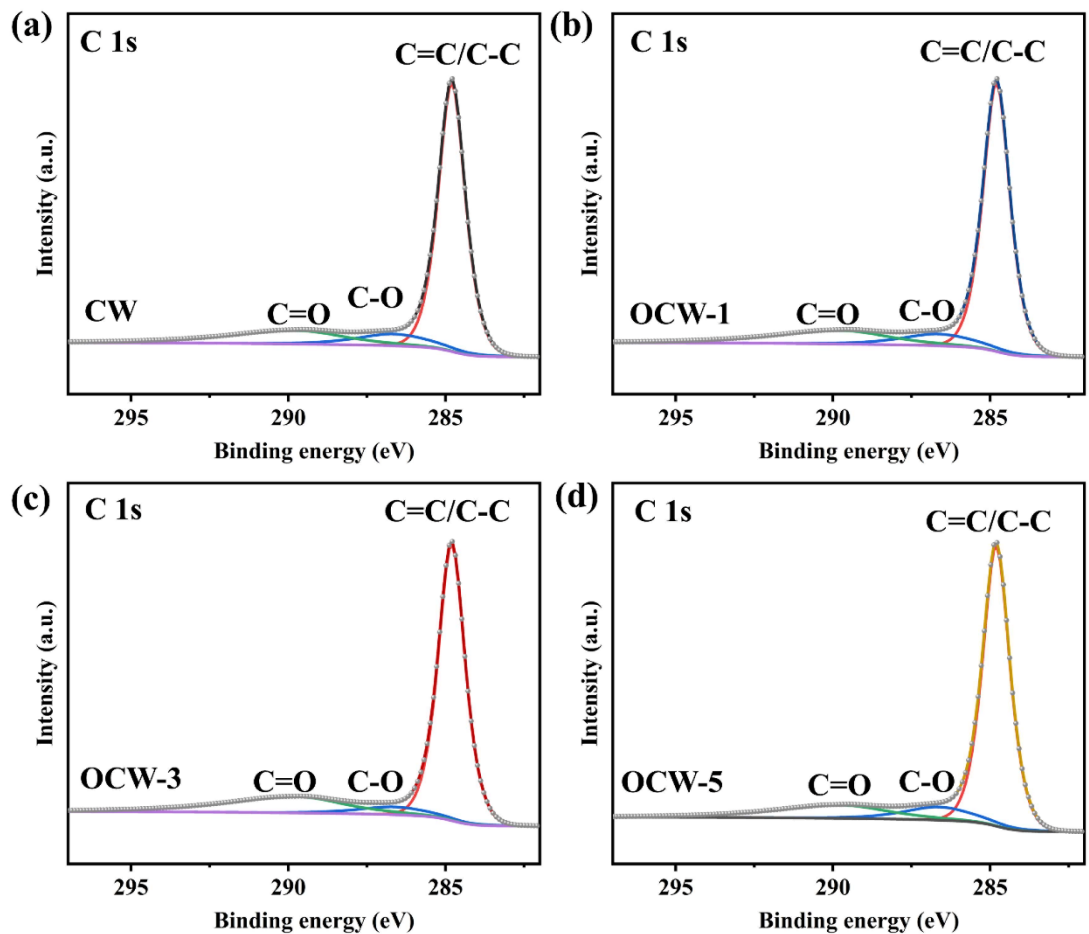

**Fig. S1** High-resolution C 1s spectrum of CW (a), OCW-1 (b), OCW-3 (c), OCW-5 (d).

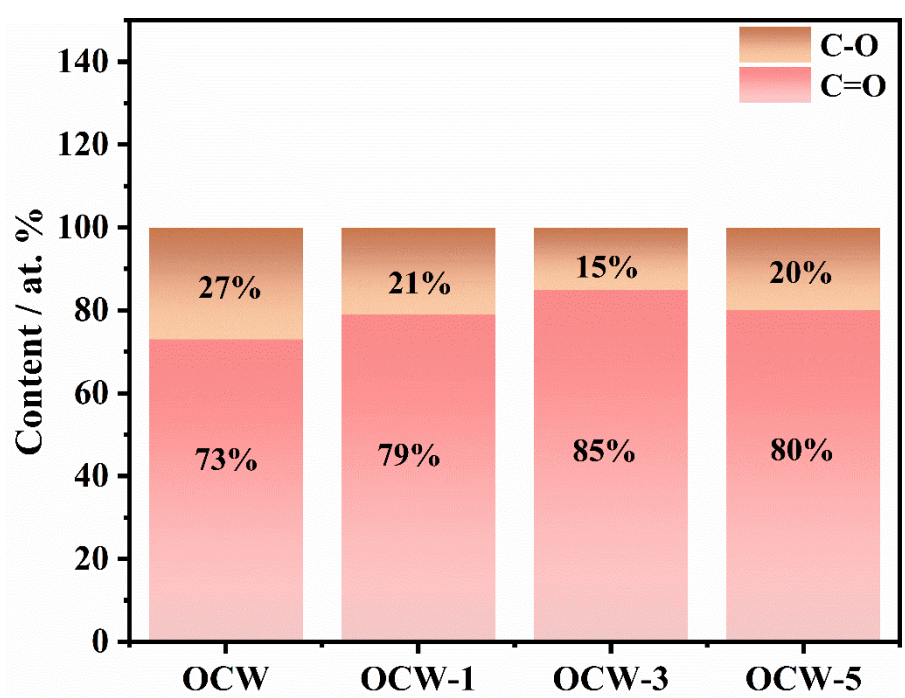

**Fig. S2** The proportion of oxygen-containing functional groups in different samples.

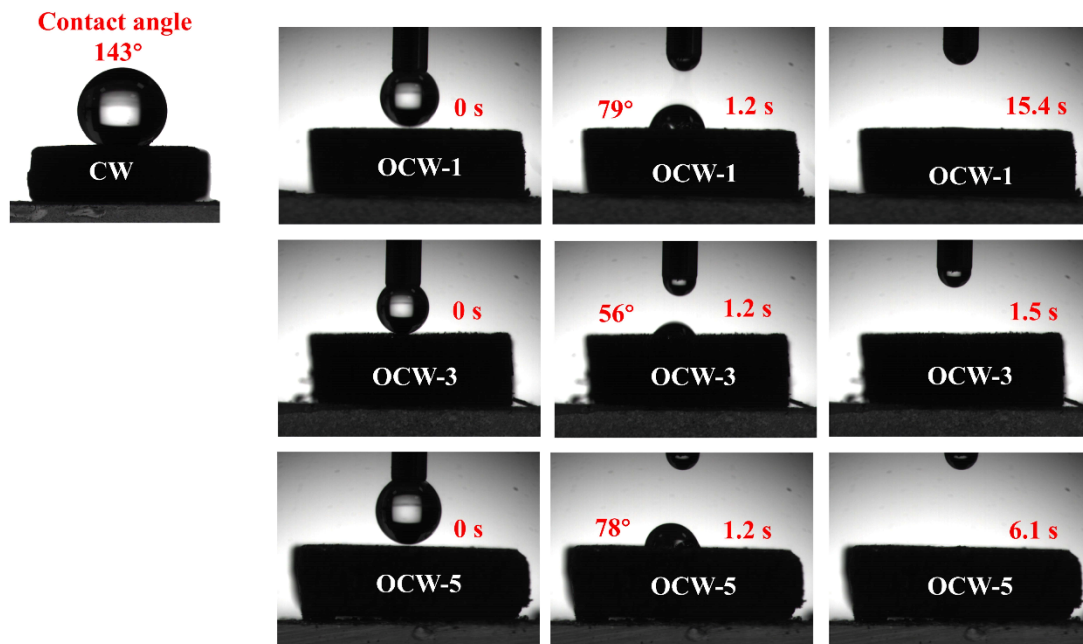

**Fig. S3** Water contact angle measurements of CW, OCW-1, OCW-3, and OCW-5.

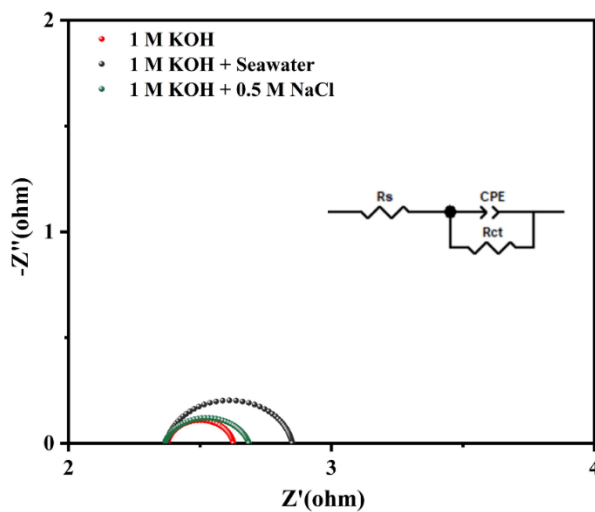

**Fig. S4** EIS plots of OCW-3 in different electrolytes.

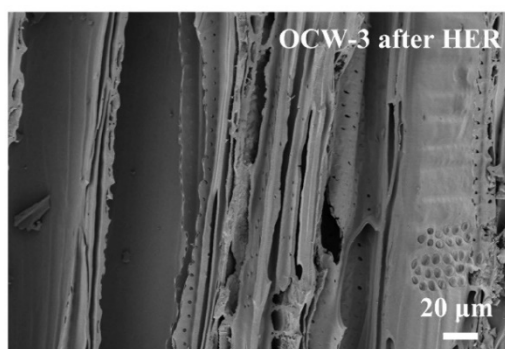

**Fig. S5** SEM images of OCW-3 after HER.

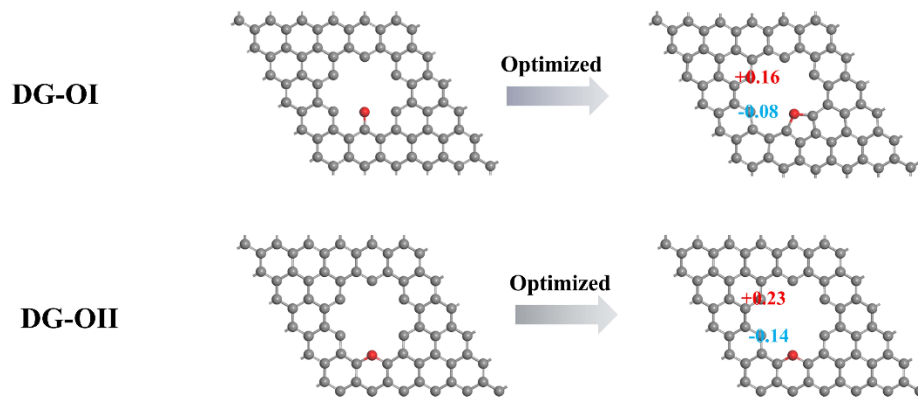

**Fig. S6** Optimized model structure of DG-OI and DG-OII.

**Fig. S7** The structures of G, DG, DG-OI and DG-OII in the electrocatalytic alkaline hydrogen evolution process.

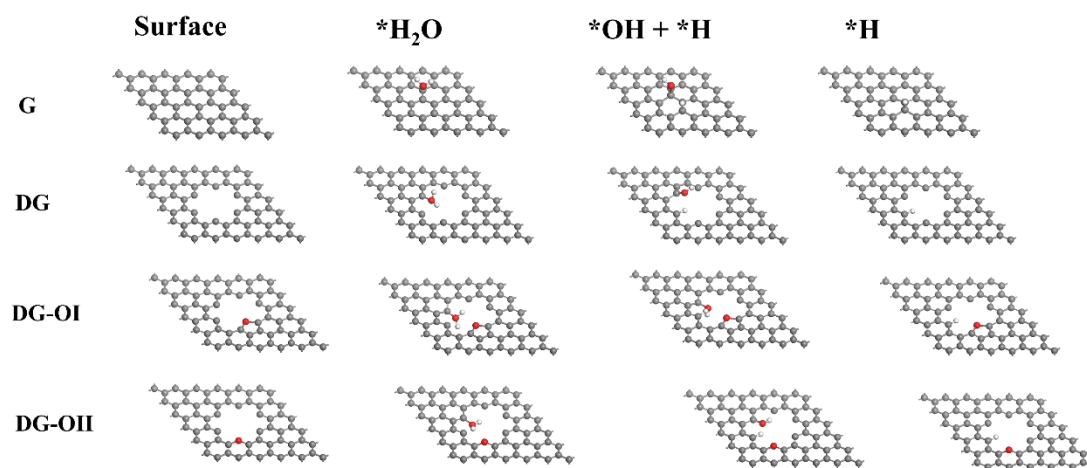

**Table S1** The content of different oxygen-containing functional groups in CW, OCW-1, OCW-3, and OCW-5 before the HER test and OCW-3 after the HER test.

| Samples | O-I (C=O)  | O-II (C-O) |
|---------|------------|------------|
| CW      | 3.97 At. % | 1.47 At. % |
| OCW-1   | 5.00 At. % | 1.27 At. % |
| OCW-3   | 5.48 At. % | 0.99 At. % |
| OCW-5   | 4.98 At. % | 1.20 At. % |

**Table S2** Comparison of HER performance of different carbon-based catalysts.

| Carbon sources                  | $\eta_{10}$ (mV) | Tafel slope (mV dec <sup>-1</sup> ) | Electrolytes                         | Ref.      |
|---------------------------------|------------------|-------------------------------------|--------------------------------------|-----------|
| Silk cocoon                     | 354              | 310                                 | 1 M KOH                              | 7         |
| Luffa sponge                    | 492              | 253                                 | 0.5 M H <sub>2</sub> SO <sub>4</sub> | 8         |
| Catkin                          | 741              | 179                                 | 1 M KOH                              | 9         |
| Catkin (NiOOH@C-MC)             | 696              | 180                                 | 1 M KOH                              | 9         |
| Catkin (MoS <sub>2</sub> @C-MC) | 523              | 223                                 | 1 M KOH                              | 9         |
| Cypress leaves                  | 253              | 286                                 | 1 M KOH                              | 10        |
| Cattail spike (NBCF)            | 363              | 550                                 | 1 M KOH                              | 11        |
| Wood                            | 245              | 171                                 | 1 M KOH                              | This work |

## References

1. G. Kresse, J. Hafner, *Phys. Rev. B*, 1993, **47**, 558-561.
2. G. Kresse, J. Hafner, *Phys. Rev. B*, 1994, **49**, 14251-14269.
3. P. E. Blöchl, *Phys. Rev. B*, 1994, **50**, 17953-17979.
4. G. Kresse, D. Joubert, *Phys. Rev. B*, 1999, **59**, 1758-1775.
5. J. P. Perdew, K. Burke, M. Ernzerhof, *Phys. Rev. Lett.*, 1996, **77**, 3865-3868.
6. Monkhorst, H.J. and J.D. Pack, *Physical Review B*, 1976, **13**, 5188-5192.
7. W. Xiao, Y. Li, Y. Zhang, P. Wang and N. Qi, *Fuel*, 2024, **369**, 131797.

8. C. R. Ratwani, S. Karunarathne, A. R. Kamali and A. M. Abdelkader, *ACS Appl. Mater. Interfaces*, 2024, **16**, 5847-5856.
9. J. Liu, S. Zhao, C. Wang, Y. Ma, L. He, B. Liu and Z. Zhang, *J. Colloid Interface Sci.*, 2022, **608**, 1627-1637.
10. M. Krishnamachari, P. Vijayakumar, M. Kumar, M. Senthil Pandian and J.-H. Chang, *Mater. Lett.*, 2024, **357**, 135652.
11. S. Hong, N. Song, E. Jiang, J. Sun, G. Chen, C. Li, Y. Liu and H. Dong, *J. Colloid Interface Sci.*, 2022, **608**, 1441-1448.
